# Supplementary material
Source: MDPI journal article supplement (https://www.mdpi.com/2227-9717/11/8/2377)
Supplement: s1 [file s1]

# Evaluating Nationwide Non-Point Source Pollution of Crop Farming and Related Environmental Risk in China

Yang Duan <sup>1,2</sup>, Hongqiang Jiang <sup>1,2</sup>, Xiao Huang <sup>3</sup>, Wenhui Zhu <sup>4</sup>, Jie Zhang <sup>5,\*</sup>, Bo Wang <sup>6</sup>  
and Wenjun Wu <sup>1,2,\*</sup>

## Section List:

**Section S1.** Details of methods for the dissolved and adsorbed NPS pollutants components

**Section S2.** Details of methods for the inputs in the nitrogen (N)/phosphorous (P) balance model

**Section S3.** Details of methods for the outputs in the N/P balance model

**Section S4.** Details data source and data-pre-processing

## Figure List:

Figure S1. The distribution of land use in China in 2015..... 10

Figure S2. The Spatiotemporal distribution of annual precipitation in 2015..... 11

Figure S3. The distribution of slope correction factor, soil correction factor, vegetation correction factor and natural correction factor in China .....12

Figure S4. Classification of 31 provinces on the basis of amount of nutrient balance and nutrient balance rate ..... 13

Figure S5. Temporal changes of dissolved pollutant in 2015..... 13

Figure S6. The rating of NPS pollution risk for P in 2015..... 14

## Table List:

Table S1. Ratio of nutrient in compound fertilizer..... 15

Table S2. The weighting factors of different indices for N/P pollution risk assessment..... 15

Table S3. Ratio of nutrient in compound fertilizer ..... 16

|                                                                                      |    |
|--------------------------------------------------------------------------------------|----|
| Table S4. The N/P excretion coefficients for different livestock categories in China | 16 |
| Table S5. Parameter values for calculating the straw incorporation inputs            | 17 |
| Table S6. Ratio of straw returning to the field in different provinces               | 17 |
| Table S7. Parameters for estimating cake fertilizer input                            | 18 |
| Table S8. Coefficients for estimating the seed input                                 | 18 |
| Table S9. Coefficients for estimating the crop uptake output                         | 19 |
| Table S10. Coefficients for estimating the runoff and leaching output                | 19 |
| Table S11. The N inputs in the 31 provinces of China in 2015                         | 21 |
| Table S12. The phosphorus inputs in the 31 provinces of China in 2015                | 23 |
| Table S13. The N outputs in the 31 provinces of China in 2015                        | 25 |
| Table S14. The nutrient balance of the farmland in the 31 provinces in 2015          | 27 |
| Table S15. Comparison of the N budget in different research                          | 30 |

## Section S1. Detailed calculation of the dissolved and adsorbed NPS pollutants components

### 1. Natural correction factor $nf$

$nf$  represents the natural correction factor which is in connection with the slope, vegetation coverage and soil texture, and the equations are shown below(Wang *et al.*, 2010):

$$nf = G_{cf} \times V_{cf} \times S_{cf} \quad (S1)$$

$$G_{cf} = \frac{G - G_{\min}}{G_{\max} - G_{\min}} \quad (S2)$$

$$V_{cf} = \frac{V - V_{\min}}{V_{\max} - V_{\min}} \quad (S3)$$

$$S_{cf} = \frac{S - S_{\min}}{S_{\max} - S_{\min}} \quad (S4)$$

Where  $G_{cf}$ ,  $V_{cf}$  and  $S_{cf}$  are slope, vegetation and soil texture correction factor.  $G$ ,  $V$  and  $S$  stand for slope, vegetation cover and clay content of the grid.  $G_{\max}$  and  $G_{\min}$  are the maximum and minimum slope in the study area.  $V_{\max}$  and  $V_{\min}$  represent the maximum and minimum vegetation cover in the study area.  $S_{\max}$  and  $S_{\min}$  represent the maximum and minimum clay content in the study area.

### 2. Soil erosion amount $A$

The soil erosion amount  $A$  is calculated based on the universal soil loss equation (USLE) by wischmeier(Wischmeier, 1977) as follows:

$$A = R \times K \times L \times S \times C \times P \quad (S5)$$

where  $R$  is the average annual rainfall erosivity factor in MJ mm/(ha h) which are calculated by the storm energy( $E$ ) and peak 30-min rainfall intensity( $I_{30}$ )(Zhang *et al.*, 2016);  $K$  is the soil erodibility factor (t•hm<sup>2</sup>•MJ•mm) ; the variables  $L$  and  $S$  are the slope-length factors, respectively is the cover-management factor, and  $P$  is the supporting practice factor.

$$R = \sum_{i=1}^{12} \left\{ 1.735 \times 10^{(1.5 \times \lg \frac{P_i^2}{P} - 0.8188)} \right\} \quad (S6)$$

where  $P$  is the average annual rainfall(mm);  $P_i$  is the monthly average rainfall(mm).  $K$  is calculated as the following equation(Sharpley and Williams, 1990):

$$K = \left\{ 0.2 + 0.3 \exp[-0.0256 SAN(1 - SIL / 100)] \right\} \left( \frac{SIL}{CLA + SIL} \right)^{0.3} \quad (S7)$$

$$\left( 1 - \frac{0.25C}{C + \exp(3.72 - 2.95C)} \right) \left( 1 - \frac{0.75SNI}{SNI + \exp(-5.51 + 22.9SNI)} \right)$$

$$SNI = (1 - SAN) / 100 \quad (S8)$$

where  $SAN$  is the sand content(2-0.05mm),  $SIL$  is the silt content (0.05-0.002mm),  $CLA$  is the clay content,  $C$  is the soil organic carbon content (%). The slope factor  $L$  and steepness factor  $S$  can be formulated according to the Eq. (S13) and Eq. (S14):

$$L = \left( \frac{\lambda}{22.13} \right)^m \quad (S9)$$

$$m = \begin{cases} 0.2 & \theta < 1^\circ \\ 0.3 & 1^\circ \leq \theta < 3^\circ \\ 0.4 & 3^\circ \leq \theta < 5^\circ \\ 0.5 & \theta > 5^\circ \end{cases} \quad (S10)$$

$$S = \begin{cases} 10.8 \sin \theta + 0.03 & \theta < 5^\circ \\ 16.8 \sin \theta - 0.05 & 5^\circ \leq \theta < 10^\circ \\ 21.91 \sin \theta - 0.96 & 10^\circ \leq \theta < 29^\circ \\ 9.5988 & \theta > 29^\circ \end{cases} \quad (S11)$$

where  $\theta$  is the slope gradient, and the factor  $C$  can be calculated as follows (Cai CF, 2000):

$$C = \begin{cases} 1 & c = 0 \\ 0.6508 - 0.3436 \lg c & 0 < c \leq 78.3\% \\ 0 & c > 78.3\% \end{cases} \quad (S12)$$

Where  $c$  is the average annual vegetation coverage. The value of  $P$  for different land-use type are set to different value depending on the land-use type(Mei, 2014).

## Section S2. Detailed calculation the inputs in the N/P balance model

### 1. Mineral fertilizer

The amount of nutrient from the chemical fertilizer is sum of the N fertilizer (P fertilizer) and the nutrient in the compound fertilizer. This can be expressed as:

$$Ftlz_N = (Pftlz + Pftlz_{syn} \times fcnt_n) \times ratio_{N-ag} \quad (S13)$$

$$Ftlz_P = (Pftlz \times 0.4366 + Pftlz_{syn} \times fcnt_p) \times ratio_{P-ag} \quad (S14)$$

Where  $Ftlz_N$  and  $Ftlz_P$  is the input of N and P via the mineral fertilizer,  $Pftlz$  is the consumption of the N fertilizer and P fertilizer, 0.4366 is the conversion factor from  $P_2O_5$  to P,  $Pftlz_{syn}$  is the consumption of the compound fertilizer,  $fcnt$  is the N and P content in the compound fertilizer with a different value in six regions of China (Li and Jin, 2011)(Table S1),  $ratio_{N-ag}$  and  $ratio_{P-ag}$  are the proportion of the mineral fertilizer consumption used for crop with a value of 94% in N and 92.6% in P(Liu, 2005).

### 2. Excrements of animal

Professional and large-scale livestock and poultry farming has gradually become the main production method of livestock and poultry products. The resulting large amount of excrements returning to field is the primary source of nutrients in farmland. A method considering the breeding stage, raised period for different livestock is used to calculate the nutrient input in manure with a livestock category of pig, cattle, large domestic animal (horse, mule and donkey), sheep and goat, rabbit, poultry and so on. And each of these categories is divided into the some stages according to their different excretion coefficients. This can be expressed as:

$$N_{im} = \sum_{i=1}^n \frac{Q_i \times T_i \times q_i \times r}{365 \times 1000} \quad (S15)$$

$$P_{im} = \sum_{i=1}^n \frac{Q_i \times T_i \times q_i \times r}{365 \times 1000} \quad (S16)$$

Where  $N_{im}$  and  $P_{im}$  is nutrient input of farmland from the excrements,  $Q_i$  is the feeding amount,  $T_i$  is the raising period,  $q_i$  is the excretion coefficient,  $r$  is the ratio of excrement returning to the field with the value of 47%、57%、42%、53% and 51% for pig, beef, horse, sheep, chicken manure, respectively. These coefficients listed in Table S2 are based on the previous studies(Wang *et al.*, 2014)

### 3. Straw manure input

Crop straw, as a biomass by-product of agricultural production, has huge potential utilization value. The recycled straw can increase soil nutrient content, promote soil carbon sequestration and improve soil structure. The computing method for straw manure input can be expressed as:

$$N_{is} = \sum_{i=1}^n g_i \times p_i \times a_{ni} \times r_i \times 0.85 \quad (S17)$$

$$P_{is} = \sum_{i=1}^n g_i \times p_i \times a_{pi} \times r_i \times 0.85 \quad (S18)$$

Where  $g_i$  is the crop yield,  $p_i$  is the ratio of grain to straw,  $a_{ni}$  and  $a_{pi}$  are the concentration of N and P in straw,  $r_i$  is the ratio of straw returning to the field, 0.85 is the conversion factor after removing moisture from straw. The corresponding parameters are listed in the Table S3 and S4(ZHANG *et al.*, 2017).

### 4. Cake fertilizer input

The cake fertilizer input is estimated by the rate of cake, rate of crop to oil, N/P in cake and the ratio of cake returning to the field based on the data from “Nation Agro-Tech Extension and Service Center” (Table S5).

$$N_{ic} = \sum_{i=1}^n g_i \times o_i \times c_i \times a_{ni} \times r \quad (S19)$$

$$P_{ic} = \sum_{i=1}^n g_i \times o_i \times c_i \times a_{pi} \times r \quad (S20)$$

Where  $g_i$  is the crop yield,  $o_i$  is the rate of crop to oil,  $c_i$  is the rate of cake,  $a_{ni}$  and  $a_{pi}$  are the N/P in cake,  $r$  is the ratio of cake returning to the field.

## 5. Atmospheric deposition

Atmospheric deposition includes wet and dry deposition. Wet deposition mainly depends on the emission of ammoniacal N and fertilizing amount. With the rapid development of stock husbandry, fertilizer usage and fossil fuel burning, the amount of atmospheric N has increased rapidly in recent years. The result shows the N deposition input along with the rainfall is 8-30 kg.ha<sup>-1</sup>.yr<sup>-1</sup> in northern China while the value is 16.5-34.95 kg•ha<sup>-1</sup>•yr<sup>-1</sup> because of the plentiful precipitation(Zhang Min, 1992). The wet deposition flux of N for every province is based on published paper(Wang *et al.*, 2014). The dry deposition for N is mainly from the re-deposition of volatile ammonia and other N compounds (such as NO<sub>2</sub>). The amount of dry deposition for N is calculated as follows:

$$Dpzt_d = (Ftlz_n + N_{im}) \times p_v \times coff_{dpt} \times p_f \times 1.25 \quad (S21)$$

Where  $Dpzt_d$  is the amount of dry deposition for N,  $Ftlz_n$  and  $N_{im}$  are the N of fertilizer and manure,  $p_v$  is the loss rate of ammonia volatilization with a value of 24.5% for fertilizer and 30% for manure,  $coff_{dpt}$  is the deposition rate of ammonia with a default value of 15%,  $p_f$  is the proportion of cultivated land to total land area.

## 6. Seed

The method for seed input is expressed as follows:

$$N_{is} = \sum_{i=1}^2 \sum_{j=1}^9 area_{ij} \times sd_{ij} \times sow_{ij} \times 0.001 \quad (S22)$$

where  $N_{is}$  is the nutrient input(tons),  $area_{ij}$  is the sowing area(hm<sup>2</sup>),  $sd_{ij}$  is the seeding

rate(kg•hm<sup>-2</sup>),  $sow_{ij}$  is the nutrient content in seeds (%) and the specific values are showed in Table S6(Peng *et al.*, 2004).

## 7. Biological N fixation

Biological N fixation contains symbiotic and non-symbiotic N fixation. We assume 2/3 of the N absorbed by leguminous plants is from the symbiotic N fixation. The value of N uptake per crop production is 72 kg•t<sup>-1</sup> and 68 kg•t<sup>-1</sup> for soybean and peanut(R.K, 1998). The non-symbiotic N fixation rate in paddy and upland fields is set as 30 kg•hm<sup>-2</sup>•yr<sup>-1</sup> and 15 kg•hm<sup>-2</sup>•yr<sup>-1</sup>(Liu, 2005).

$$Bnf = Bnf_{sym} + Bnf_{non} \quad (S23)$$

$$Bnf_{sym} = \sum_{i=1}^2 soybean_i \times scnt_i \times 0.6 \times 0.001 \quad (S24)$$

$$Bnf_{non} = \sum (area_p \times nf_p + area_d \times nf_d) \times 0.001 \quad (S25)$$

Where  $Bnf$  is the total biological N fixation,  $Bnf_{sym}$  is the symbiotic N fixation and  $Bnf_{non}$  is the non-symbiotic N fixation.  $soybean_i$  is the yield of leguminous plants (i=1 soybean, i=2 peanut),  $scnt_i$  is the value of N uptake per crop production.  $area_p$  and  $area_d$  are the area of paddy and upland fields, respectively,  $nf_p$  and  $nf_d$  are non-symbiotic N fixation rate in paddy and upland fields, respectively.

## 8. Irrigation input

The nutrient from irrigation depends on the content in the water and the irrigation amount. The value in northern China is smaller than in southern China, and in this paper the value in northern China is set as 4.7 kg •hm<sup>-2</sup>•yr<sup>-1</sup> and 6.0 kg •hm<sup>-2</sup>•yr<sup>-1</sup> in southern China.



### Section S3. Detailed calculation the outputs in the N/P balance model

#### 1. Crop uptake

The crop uptake is the main output item of farmland nutrient balance. In this research we choose 13 kinds of stable crops in China with a certain uptake coefficient via reviewing the related literatures in Table S7(Li and Jin, 2011).

#### 2. Gaseous nitrogen

There is a loss of gaseous nitrogen during the transformation of inorganic nitrogen including ammonia volatilization and denitrification. The factors affecting the rate of denitrification and volatilization mainly cover fertilization frequency, fertilizer type, crop type, and farming operation(Chen *et al.*, 2008). The amount of ammonia volatilization and denitrification outputs can be calculated by the following equations.

$$Gas_{NH_3} = Ftlz \times \frac{(fvnt_p \times area_p + fvnt_d \times area_d)}{fvnt_p + fvnt_d} + N_{im} \times fvnt_a \quad (S26)$$

$$Gas_{NOx} = Ftlz \times \frac{(fdnt_p \times area_p + fdnt_d \times area_d)}{fdnt_p + fdnt_d} + N_{im} \times fdnt_a \quad (15)$$

Where the  $Gas_{NH_3}$  and  $Gas_{NOx}$  are the ammonia volatilization and denitrification outputs.  $Ftlz$  is the input of N via the mineral fertilizer.  $fvnt_p$  and  $fdnt_p$  are the volatilization and denitrification loss rate for paddy with the value of 11% and 20%, respectively.  $fvnt_d$  and  $fdnt_d$  are the volatilization and denitrification loss rate for upland with the value of 10% and 14%, respectively.  $area_p$  and  $area_d$  are the area of the paddy and upland.  $N_{im}$  is the N of farmland from the excrements.  $fvnt_a$  and  $fdnt_a$  are the volatilization and denitrification loss rate for upland with the manure of 13%.

#### 3. Runoff and Leaching

The nutrient output from runoff and leaching are calculated by using empirical coefficient method and the runoff and leaching coefficient are from the output in the first national pollution census (Table S8). For lack of the correlation parameter for the phosphorus runoff and leaching, 20% of the phosphorus fertilizer input is considered as the amount of runoff and leaching based on previous study(Li and Jin, 2011).

#### **Section S4. Details data source and data-pre-processing**

The study area contained the entire land area of mainland China, including 31 provinces, autonomous regions and municipalities, while Hong Kong, Macao and Taiwan and the South China Sea Islands were out of study area due to limitation regarding data available from these regions. Input data in this study complied as two categories: statistical data and spatial data. The statistical data, such as consumption of chemical fertilizers, crops sown area, crop yield, amount of livestock and poultry, rural population, the effective irrigated area, was obtained from the China Agricultural Yearbook, China Rural Statistical Yearbook, as well as provincial and municipal statistical yearbooks in 2015. More than 600,000 data items from 341 municipal administrative units were entered into database in the calculation. The spatial data, such as the land cover data, soil attribute data, vegetation cover data, were obtained from various public sources. Details about the input data are found in Table S1.

In this study, data pre-progressing contained the missing data's filling-up and interpolation of spatial data in GIS. Because of the complicated index system with more than 60 fields, much data was not counted in county-level. The scarce data were generated by checking out other relevant yearbooks or statistical data, or using the data in adjacent years. Considering the small proportion of general planting area in municipal districts, it was necessary to combine them, and a total of 2,151 statistical units were saved after the combination. Then the GIS software was used to superimpose the county-level data results with the boundary of the administrative region for spatial processing.

## Supplementary Figures

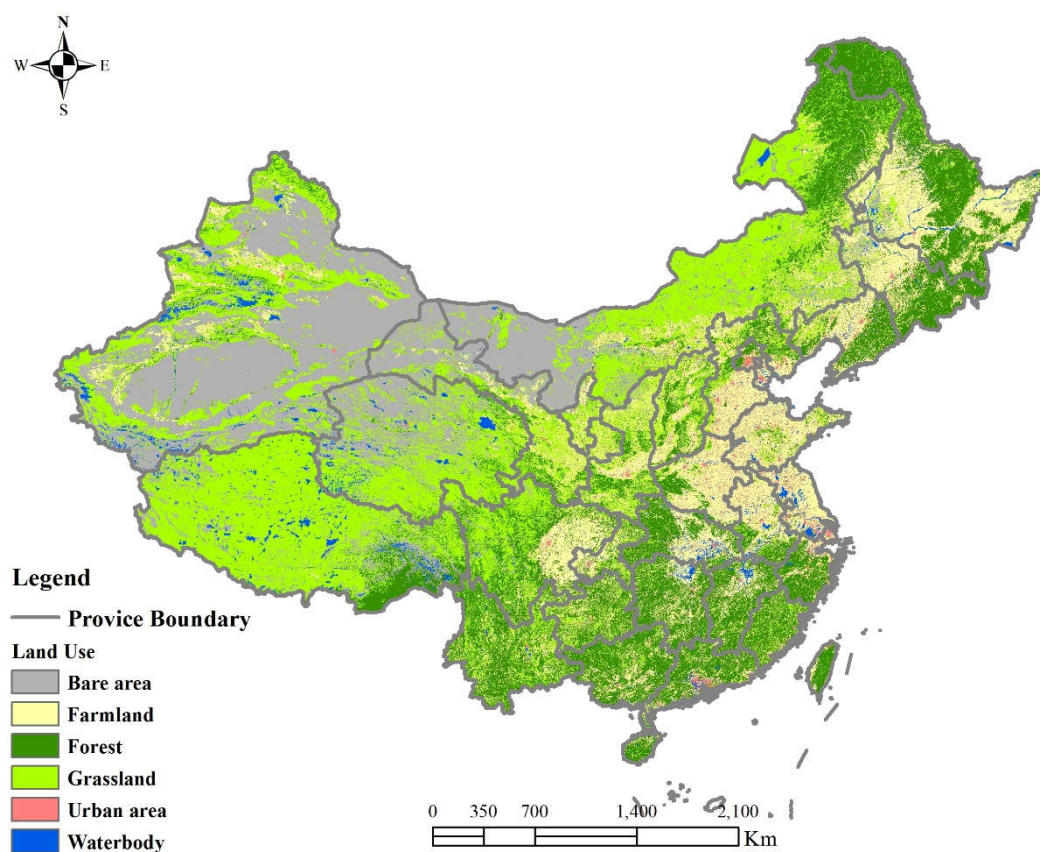

Figure S1. The distribution of land use in China in 2015(100m resolution)

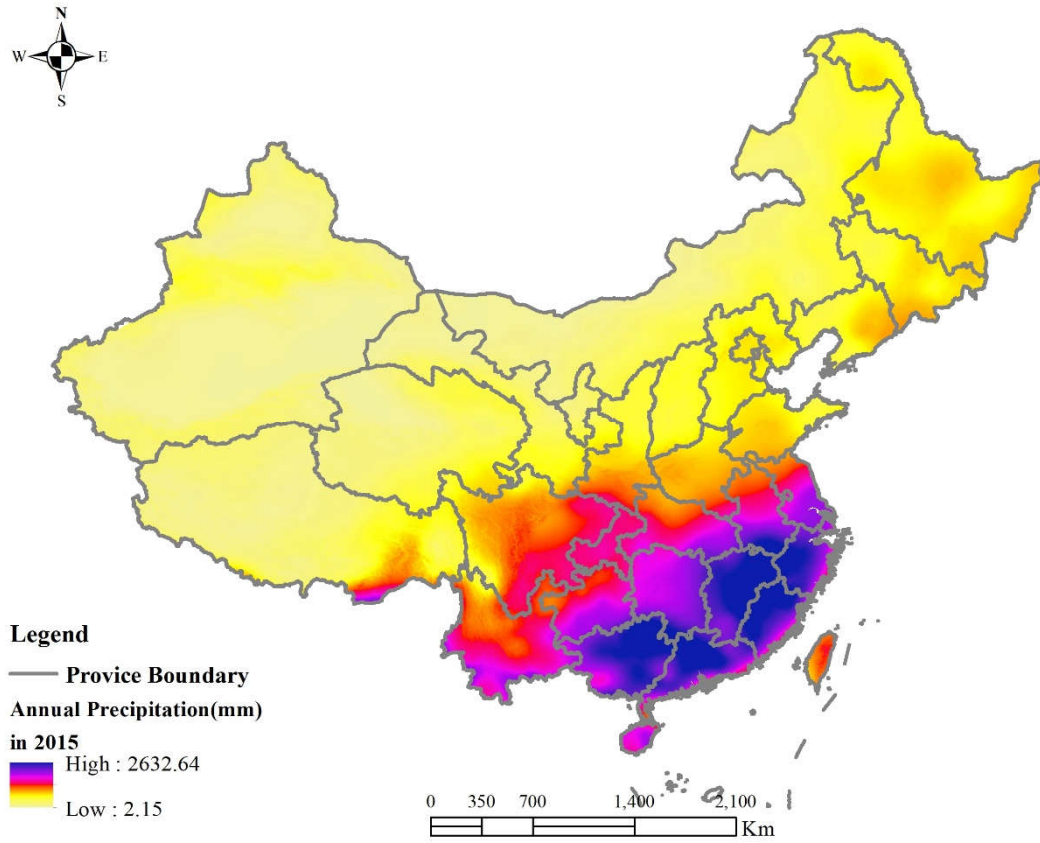

Figure S2. The Spatiotemporal distribution of annual precipitation in 2015

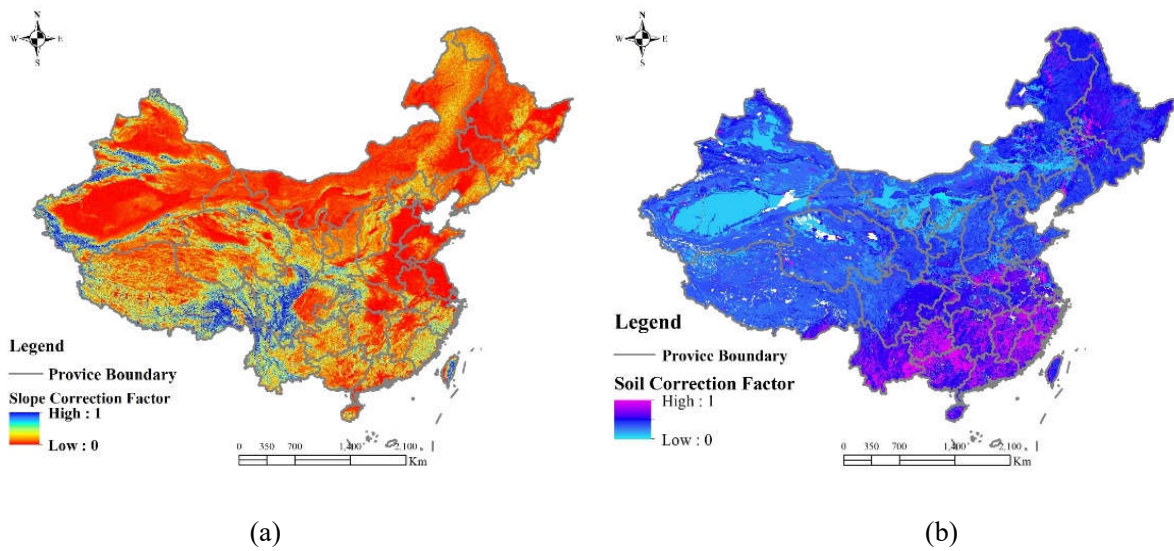

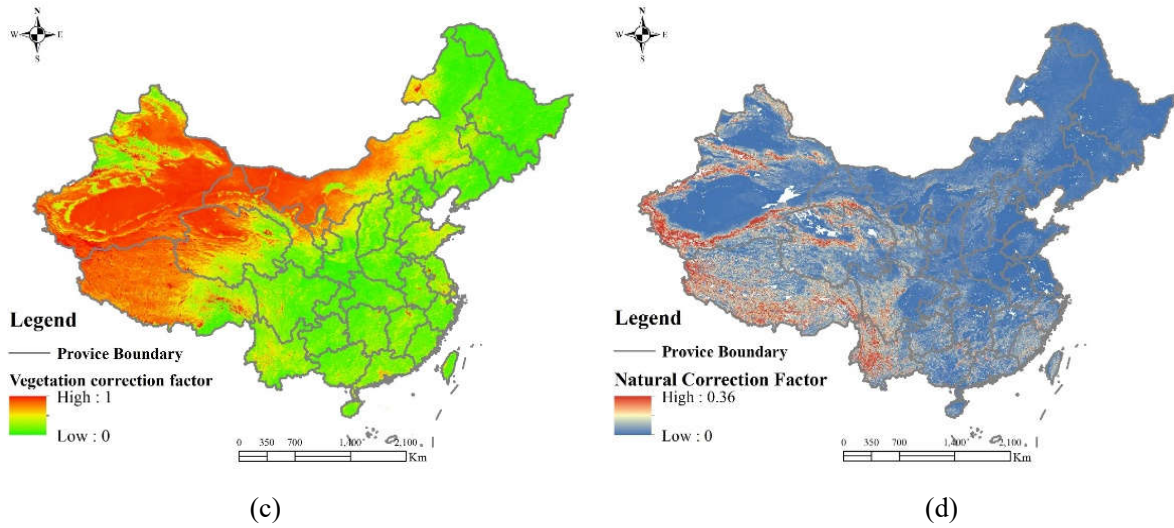

Figure S3. The distribution of slope correction factor, soil correction factor, vegetation correction factor and natural correction factor in China. (a) slope correction factor; (b) soil correction factor; (c) vegetation correction factor; (d) natural correction factor;

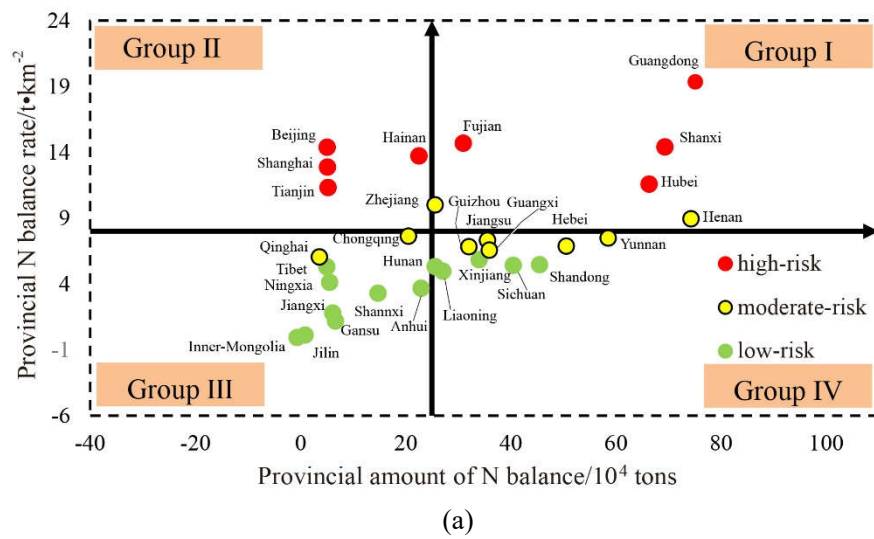

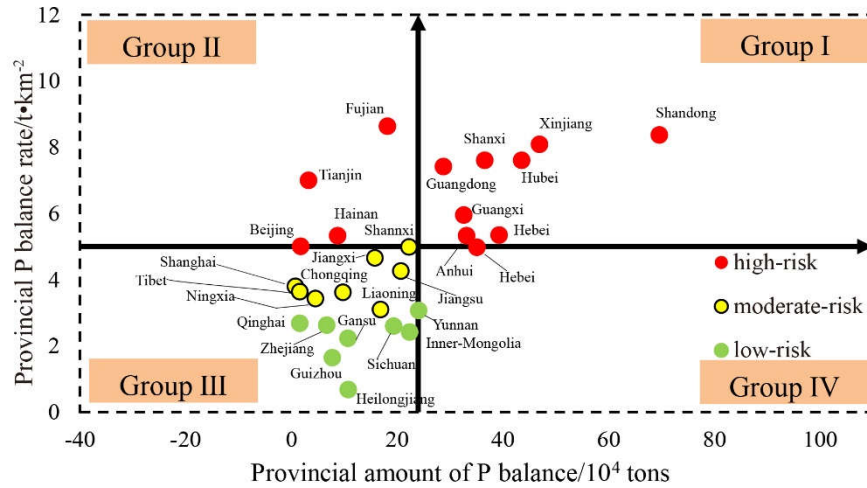

(b)

Figure S4. Classification of 31 provinces on the basis of amount of nutrient balance and nutrient balance rate.

Group I located in the upper right-hand quadrant shows the provinces which have large nutrient surplus such as Guangdong, Hubei. Group II located in the upper left-hand quadrant shows provinces with a small nutrient balance amount but have a large balance rate because of its less arable land. Group III located in the lower left-hand quadrant shows that these provinces have a small nutrient balance either in total amount or in balance rate. Group IV, located in the lower right-hand quadrant shows the provinces have a large nutrient surplus and a small balance rate because of the large amount of the arable land.



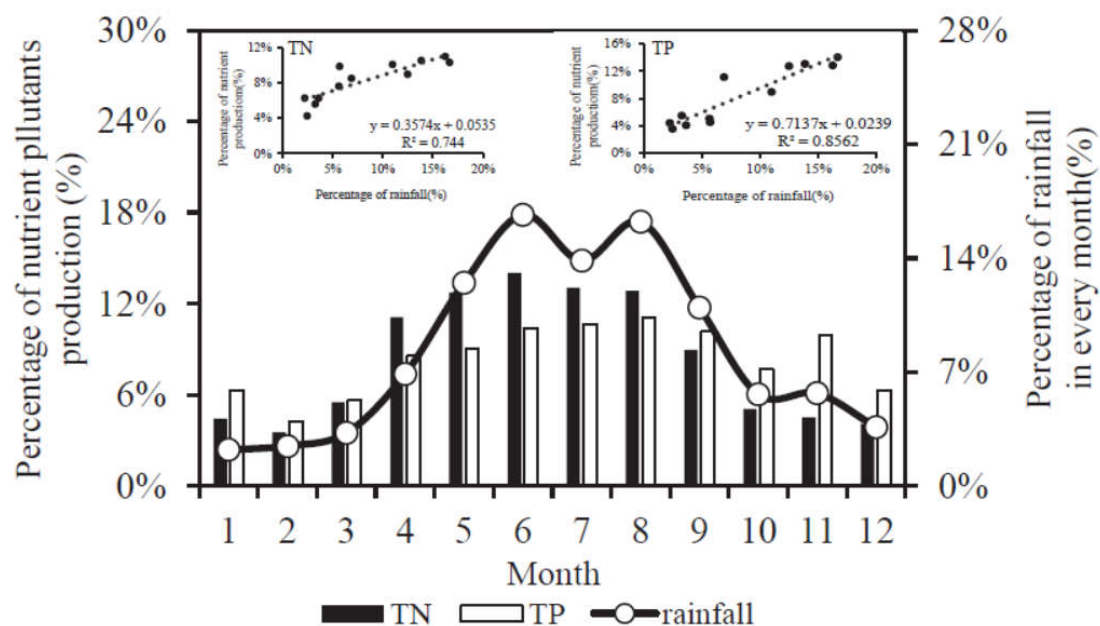

Figure S5 Temporal changes of dissolved pollutant in 2015

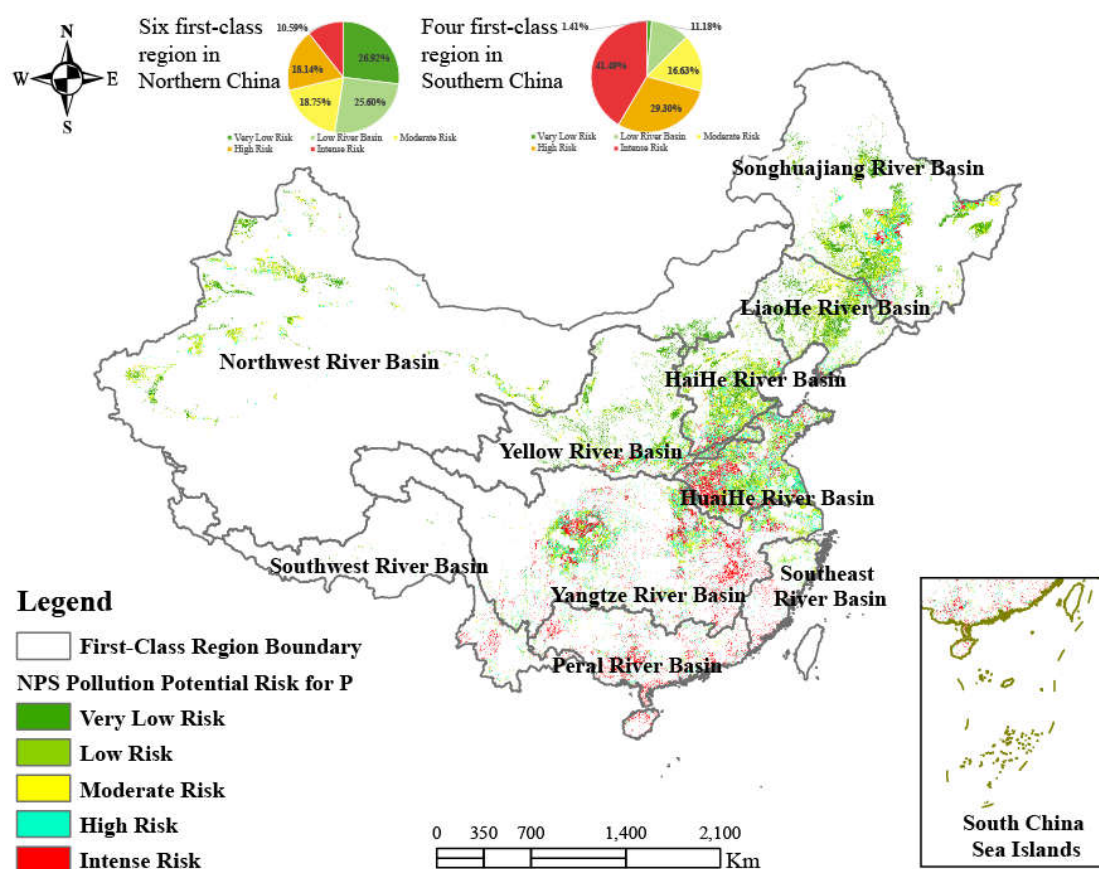

Figure S6 Potential pollution risk of NPS in 2015 (P pollution)



## Supplementary Tables

Table S1 Description of data used in the study

| Data type                   | Scale          | Description                                                                                                                                                                                   | Data source                                                                                                                    |
|-----------------------------|----------------|-----------------------------------------------------------------------------------------------------------------------------------------------------------------------------------------------|--------------------------------------------------------------------------------------------------------------------------------|
| Land Cover                  | 1:250 000      | Land cover data in 2015                                                                                                                                                                       | Institute of Geographic Sciences and Natural Resources Research, Chinese Academy of Science                                    |
| Geographic                  | Grid:30m × 30m | Digital elevation model                                                                                                                                                                       | Geospatial Data Cloud<br><a href="http://www.gscloud.cn">http://www.gscloud.cn</a>                                             |
| Soil map                    | 1:1 000 000    | Soil classifications, soil particle size (the content of sand, silt and clay) and chemical character (the content of total nitrogen, total phosphorus, and soil organic matter) of each type. | The soil Database of China for Land Surface Modeling from Land-Atmosphere Interaction Research Group at Sun Yat-sen University |
| Vegetation                  | 1:1 000 000    | Vegetation coverage rate in 2015                                                                                                                                                              | Institute of Geographic Sciences and Natural Resources Research, Chinese Academy of Science                                    |
| Meteorological              | National       | Daily precipitation Rainfall density in 739 national reference climatological stations or basic synoptic stations in 2015.                                                                    | National Meteorological Information Center                                                                                     |
| Rural and agricultural data | National       | Rural population, livestock and poultry, fertilizing amount and crop yield and so on.                                                                                                         | The statistical Yearbook 2015 in 299 cities of China                                                                           |

Table S2 The weighting factors of different indices for N/P pollution risk assessment

|           | SL  | EP | DEP | DS | SI  |
|-----------|-----|----|-----|----|-----|
| Weighting | 0.5 | 1  | 0.5 | 1  | 1.5 |

Table S3. Ratio of nutrient in compound fertilizer(Li and Jin, 2011)

| Region | Province | Ratio of N, P, K in |
|--------|----------|---------------------|
|--------|----------|---------------------|

| compound fertilizer                  |                                                               |           |
|--------------------------------------|---------------------------------------------------------------|-----------|
| Northeast China                      | Liaoning, Jilin, Heilongjiang                                 | 1:2.0:0.2 |
| North China                          | Beijing, Tianjin, Hebei, Shanxi,<br>Shandong, Henan           | 1:1.5:0.4 |
| Northwest China                      | Inner-Mongolia, Shaanxi, Gansu,<br>Qinghai, Xinjiang, Ningxia | 1:1.5:0.4 |
| Central and Southern<br>China region | Shanghai, Jiangsu, Zhejiang, Anhui,<br>Hubei, Hunan, Jiangxi  | 1:1:0.8   |
| Southwest China                      | Chongqing, Sichuan, Yunnan, Guizhou,<br>Tibet                 | 1:1:0.8   |
| South China                          | Guangdong, Guangxi, Hainan, Fujian                            | 1:1:0.8   |

Table S4. The N/P excretion coefficients for different livestock categories in China(Wang *et al.*, 2014)

|                         |                |   | Northeast | North | Eastern | South | Southwest | Northwest |
|-------------------------|----------------|---|-----------|-------|---------|-------|-----------|-----------|
|                         |                |   | China     | China | China   | China | China     | China     |
| Wine                    | Weaners        | N | 26.03     | 20.4  | 11.35   | 19.83 | 10.97     | 21.49     |
|                         |                | P | 3.05      | 3.48  | 1.44    | 2.51  | 1.94      | 2.78      |
|                         | Fattening pigs | N | 57.7      | 33.23 | 25.4    | 44.73 | 19.74     | 36.77     |
|                         |                | P | 6.16      | 6.06  | 3.21    | 5.99  | 4.84      | 4.88      |
|                         | Pregnant sows  | N | 78.67     | 43.66 | 39.6    | 51.13 | 22.02     | 40.79     |
|                         |                | P | 11.05     | 9.93  | 5.11    | 11.18 | 6.55      | 5.24      |
| Beef Cattle             | Adult          | N | 150.81    | 72.74 | 153.47  | 65.93 | 104.1     | 104.1     |
|                         |                | P | 17.06     | 13.69 | 19.85   | 10.52 | 10.17     | 10.17     |
|                         | Young          | N | 61.91     | 20.33 | 53.55   | 30.59 | 38.27     | 38.27     |
|                         |                | P | 7         | 3.83  | 6.93    | 4.88  | 3.74      | 3.74      |
| Horse, mule, and donkey | Adult          | N | 150.81    | 72.74 | 153.47  | 65.93 | 104.1     | 104.1     |
|                         |                | P | 17.06     | 13.69 | 19.85   | 10.52 | 10.17     | 10.17     |
|                         | Young          | N | 61.91     | 20.33 | 53.55   | 30.59 | 38.27     | 38.27     |
|                         |                | P | 7         | 3.83  | 6.93    | 4.88  | 3.74      | 3.74      |
| Sheep and goats         | Adult          | N | 25.62     | 11.57 | 22.16   | 12.66 | 15.84     | 15.84     |
|                         |                | P | 2.9       | 2.18  | 2.87    | 2.20  | 1.55      | 1.55      |
|                         | Young          | N | 40.76     | 18.41 | 35.26   | 20.14 | 25.19     | 25.19     |
|                         |                | P | 4.61      | 3.46  | 4.56    | 3.21  | 2.46      | 2.46      |
| Rabbits                 |                | N | 1.85      | 1.27  | 1.02    | 0.71  | 0.71      | 1.85      |
|                         |                | P | 0.48      | 0.3   | 0.5     | 0.06  | 0.06      | 0.46      |
| Laying hens and         |                | N | 1.12      | 1.42  | 1.06    | 1.16  | 1.16      | 1.12      |

|          |   | Northeast<br>China | North<br>China | Eastern<br>China | South<br>China | Southwest<br>China | Northwest<br>China |
|----------|---|--------------------|----------------|------------------|----------------|--------------------|--------------------|
| broilers | P | 0.23               | 0.42           | 0.51             | 0.23           | 0.23               | 0.23               |

Table S5. Parameter values for calculating the straw incorporation inputs(ZHANG *et al.*, 2017)

| Crop<br>category | Ratio of straw to<br>grains | N content in straw (%) | P content in straw (%) |
|------------------|-----------------------------|------------------------|------------------------|
| Rice             | 0.9                         | 0.91                   | 0.13                   |
| Corn             | 1.2                         | 0.92                   | 0.15                   |
| Wheat            | 1.1                         | 0.65                   | 0.08                   |
| Soybean          | 1.6                         | 1.81                   | 0.196                  |
| Tubers           | 0.5                         | 2.5                    | 0.28                   |
| Peanut           | 0.8                         | 1.82                   | 0.16                   |
| Rapeseed         | 2.5                         | 0.87                   | 0.14                   |
| Sunflower        | 2.2                         | 0.82                   | 0.111                  |
| Cotton           | 0.24                        | 1.24                   | 0.15                   |
| Sugarcane        | 1.1                         | 1.1                    | 0.14                   |
| Sugar beet       | 1                           | 0.25                   | /                      |

Table S6. Ratio of straw returning to the field in different provinces(ZHANG *et al.*, 2017)

| Province     | ri (%) | Province       | ri (%) |
|--------------|--------|----------------|--------|
| Liaoning     | 11.2   | Inner-Mongolia | 15.0   |
| Jilin        | 15.0   | Shaanxi        | 33.2   |
| Heilongjiang | 10.2   | Gansu          | 13.5   |
| Beijing      | 88.6   | Qinghai        | 0.8    |
| Tianjin      | 29.1   | Ningxia        | 15.0   |

| Province | ri (%) | Province  | ri (%) |
|----------|--------|-----------|--------|
| Hebei    | 80.8   | Xinjiang  | 15.0   |
| Shanxi   | 55.5   | Chongqing | 58.0   |
| Shandong | 77.8   | Sichuan   | 49.7   |
| Henan    | 60.8   | Guizhou   | 30.0   |
| Shanghai | 47.2   | Yunnan    | 22.0   |
| Jiangsu  | 26.8   | Tibet     | 0.8    |
| Zhejiang | 47.2   | Fujian    | 26.8   |
| Anhui    | 30.0   | Guangdong | 38.0   |
| Hubei    | 28.7   | Guangxi   | 45.3   |
| Hunan    | 43.1   | Hainan    | 29.1   |
| Jiangxi  | 40.0   |           |        |

Table S7 Parameters for estimating cake fertilizer input

|           | Rate of cake (%) | Rate of crop to oil (%) | N in cake (%) | P in cake (%) | ratio of cake returning to the field (%) |
|-----------|------------------|-------------------------|---------------|---------------|------------------------------------------|
| Soybeans  | 85               | 50                      | 6.68          | 0.44          | 30                                       |
| Peanut    | 50               | 43                      | 6.92          | 0.55          | 30                                       |
| Rapeseeds | 95               | 55                      | 5.25          | 0.79          | 90                                       |
| Cotton    | 80               | 94                      | 4.29          | 0.54          | 90                                       |
| Sunflower | 76.8             | 35                      | 4.76          | 1.70          | 30                                       |

Table S8. Coefficients for estimating the seed input(Peng *et al.*, 2004)

| Crop category | seeding rate(kg·hm <sup>-2</sup> ) | N content in seeds (%) | P content in seeds (%) |
|---------------|------------------------------------|------------------------|------------------------|
| Rice          | 112.5                              | 1.40                   | 0.01                   |
| Corn          | 30.0                               | 1.60                   | 0.22                   |
| Wheat         | 225.0                              | 2.10                   | 0.44                   |
| Soybean       | 67.5                               | 5.30                   | 0.47                   |

| Crop category | seeding rate(kg·hm <sup>-2</sup> ) | N content in seeds (%) | P content in seeds (%) |
|---------------|------------------------------------|------------------------|------------------------|
| Tubers        | 1312.5                             | 0.32                   | 0.03                   |
| Peanut        | 300.0                              | 4.40                   | 0.11                   |
| Rapeseed      | 1.1                                | 4.00                   | 0.00                   |
| Cotton        | 52.5                               | 3.00                   | 0.24                   |
| Sunflower     | 30.0                               | 2.61                   | 0.3                    |

Table S9. Coefficients for estimating the crop uptake output(Li and Jin, 2011)

|            | N in grain<br>(kg/t) | P in grain<br>(kg/t) | N in straw<br>(%) | P in straw<br>(%) |
|------------|----------------------|----------------------|-------------------|-------------------|
| Rice       | 14.6                 | 6.2                  | 0.91              | 0.13              |
| Corn       | 25.8                 | 9.8                  | 0.87              | 0.15              |
| Wheat      | 24.6                 | 8.5                  | 0.65              | 0.08              |
| Soybean    | 81.4                 | 23.0                 | 1.81              | 0.20              |
| Tubers     | 4.45                 | 1.0                  | 2.50              | 0.28              |
| Peanut     | 43.7                 | 10.0                 | 1.82              | 0.16              |
| Rape       | 43.0                 | 27.0                 | 0.87              | 0.14              |
| Sunflower  | 69.0                 | 20.0                 | 0.82              | 0.11              |
| Cotton     | 12.6                 | 4.6                  | 1.24              | 0.15              |
| Sugarcane  | 1.81                 | 0.36                 | 1.10              | 0.14              |
| Sugar beet | 4.8                  | 1.42                 | /                 | /                 |
| Vegetables | 4.32                 | 1.42                 | /                 | /                 |
| Fruit      | 4.95                 | 2.95                 | /                 | /                 |

Table S10. Coefficients for estimating the runoff and leaching output(Wang *et al.*, 2014)

|       | N runoff coefficient (kg ha <sup>-1</sup> yr <sup>-1</sup> ) |                 |                | N leaching coefficient (kg ha <sup>-1</sup> yr <sup>-1</sup> ) |                 |                |
|-------|--------------------------------------------------------------|-----------------|----------------|----------------------------------------------------------------|-----------------|----------------|
|       | Northern China                                               | Northwest China | Southern China | Northern China                                                 | Northwest China | Southern China |
| Rice  | 6.41                                                         | 0.05            | 16.31          | 7.29                                                           | 7.29            | 7.29           |
| Wheat | 3.36                                                         | 0.12            | 7.41           | 19.34                                                          | 4.23            | 26.12          |

|            | N runoff coefficient (kg ha <sup>-1</sup> yr <sup>-1</sup> ) |                    |                   | N leaching coefficient (kg ha <sup>-1</sup> yr <sup>-1</sup> ) |                    |                   |
|------------|--------------------------------------------------------------|--------------------|-------------------|----------------------------------------------------------------|--------------------|-------------------|
|            | Northern<br>China                                            | Northwest<br>China | Southern<br>China | Northern<br>China                                              | Northwest<br>China | Southern<br>China |
| Corn       | 2.88                                                         | 0.12               | 7.95              | 16.02                                                          | 4.23               | 34.86             |
| Soybeans   | 2.64                                                         | 0.12               | 13.55             | 18.75                                                          | 3.17               | 34.86             |
| Vegetables | 8.60                                                         | 7.98               | 18.18             | 48.98                                                          | 30.22              | 28.50             |
| Fruits     | 0.65                                                         | 7.98               | 8.16              | 16.02                                                          | 3.96               | 10.68             |

Table S11. The N inputs in the 31 provinces of China in 2015 (10<sup>4</sup> tons)

|              | Mineral<br>fertilizer | Straw | Cake<br>fertilizer | Excrements of animal | wet<br>deposition | dry<br>deposition | Biological N<br>fixation | Irrigation | Seed | Total  |
|--------------|-----------------------|-------|--------------------|----------------------|-------------------|-------------------|--------------------------|------------|------|--------|
| Liaoning     | 79.88                 | 2.03  | 0.41               | 36.15                | 6.25              | 1.70              | 13.71                    | 0.64       | 0.65 | 141.42 |
| Jilin        | 106.02                | 4.95  | 0.56               | 36.83                | 7.08              | 2.09              | 15.33                    | 0.56       | 0.63 | 174.05 |
| Heilongjiang | 105.96                | 6.18  | 3.71               | 37.28                | 29.01             | 1.95              | 46.83                    | 2.15       | 1.79 | 234.85 |
| Beijing      | 6.07                  | 0.50  | 0.01               | 3.09                 | 0.21              | 0.08              | 0.73                     | 0.06       | 0.02 | 10.76  |
| Tianjin      | 11.70                 | 0.46  | 0.09               | 3.75                 | 0.42              | 0.25              | 1.17                     | 0.13       | 0.07 | 18.04  |
| Hebei        | 175.69                | 23.99 | 1.98               | 41.04                | 5.96              | 3.26              | 18.30                    | 1.71       | 1.94 | 273.86 |
| Shanxi       | 50.48                 | 5.99  | 0.25               | 10.99                | 4.20              | 0.67              | 10.41                    | 0.67       | 0.56 | 84.23  |
| Shandong     | 214.55                | 33.13 | 3.34               | 63.61                | 10.05             | 5.82              | 21.42                    | 2.11       | 3.17 | 357.20 |
| Henan        | 320.42                | 32.17 | 5.09               | 56.34                | 7.73              | 7.14              | 27.04                    | 2.11       | 4.55 | 462.57 |
| Shanghai     | 5.98                  | 0.37  | 0.03               | 5.40                 | 0.41              | 0.15              | 1.11                     | 0.11       | 0.04 | 13.60  |
| Jiangsu      | 184.70                | 7.37  | 3.53               | 15.02                | 9.01              | 3.55              | 18.18                    | 2.27       | 1.64 | 245.28 |
| Zhejiang     | 51.68                 | 3.17  | 0.90               | 11.68                | 4.00              | 0.61              | 7.81                     | 0.81       | 0.29 | 80.94  |
| Anhui        | 156.54                | 9.39  | 5.30               | 22.83                | 12.30             | 3.02              | 25.53                    | 2.08       | 2.20 | 239.19 |
| Hubei        | 165.10                | 7.66  | 7.65               | 37.58                | 12.72             | 2.40              | 17.83                    | 1.47       | 1.37 | 253.78 |
| Hunan        | 120.75                | 11.71 | 5.94               | 32.27                | 9.94              | 1.34              | 17.00                    | 1.58       | 1.00 | 201.52 |

|                    | Mineral<br>fertilizer | Straw | Cake<br>fertilizer | Excrements of animal | wet<br>deposition | dry<br>deposition | Biological N<br>fixation | Irrigation | Seed | Total  |
|--------------------|-----------------------|-------|--------------------|----------------------|-------------------|-------------------|--------------------------|------------|------|--------|
| Jiangxi            | 59.04                 | 7.35  | 2.57               | 19.04                | 8.37              | 0.62              | 13.41                    | 1.06       | 0.86 | 112.32 |
| Inner-<br>Mongolia | 115.47                | 4.45  | 2.35               | 10.27                | 5.15              | 0.37              | 21.19                    | 1.16       | 0.91 | 161.31 |
| Shaanxi            | 118.85                | 3.59  | 1.34               | 13.02                | 5.77              | 1.16              | 12.72                    | 0.48       | 0.82 | 157.74 |
| Gansu              | 47.69                 | 1.49  | 1.17               | 5.62                 | 2.88              | 0.25              | 10.42                    | 0.55       | 0.74 | 70.81  |
| Qinghai            | 5.15                  | 0.01  | 0.74               | 3.24                 | 0.28              | 0.00              | 1.23                     | 0.08       | 0.08 | 10.82  |
| Ningxia            | 21.32                 | 0.50  | 0.04               | 1.31                 | 0.71              | 0.17              | 3.48                     | 0.23       | 0.16 | 27.92  |
| Xinjiang           | 119.91                | 3.74  | 10.77              | 7.26                 | 1.01              | 0.17              | 12.08                    | 2.26       | 0.99 | 158.17 |
| Chongqing          | 55.01                 | 6.35  | 1.39               | 8.35                 | 6.10              | 0.79              | 8.41                     | 0.25       | 0.59 | 87.22  |
| Sichuan            | 136.59                | 16.38 | 6.67               | 37.16                | 11.50             | 1.04              | 27.64                    | 1.31       | 1.88 | 240.16 |
| Guizhou            | 59.27                 | 3.94  | 2.36               | 25.37                | 8.41              | 0.89              | 10.75                    | 0.54       | 0.78 | 112.29 |
| Yunnan             | 127.42                | 8.96  | 1.69               | 28.95                | 6.59              | 1.23              | 13.99                    | 0.93       | 0.85 | 190.60 |
| Tibet              | 2.65                  | 0.00  | 0.16               | 4.72                 | 0.18              | 0.00              | 0.72                     | 0.13       | 0.02 | 8.59   |
| Fujian             | 56.02                 | 1.67  | 0.33               | 16.43                | 2.43              | 0.49              | 6.37                     | 0.54       | 0.40 | 84.67  |
| Guangdong          | 123.64                | 8.59  | 0.65               | 40.76                | 6.76              | 1.38              | 13.00                    | 0.99       | 0.96 | 196.72 |
| Guangxi            | 102.04                | 26.74 | 0.47               | 29.05                | 10.04             | 1.18              | 13.53                    | 0.84       | 0.78 | 184.66 |



|        | Mineral<br>fertilizer | Straw  | Cake<br>fertilizer | Excrements of animal | wet<br>deposition | dry<br>deposition | Biological N<br>fixation | Irrigation | Seed  | Total   |
|--------|-----------------------|--------|--------------------|----------------------|-------------------|-------------------|--------------------------|------------|-------|---------|
| Hainan | 22.00                 | 1.19   | 0.06               | 16.36                | 1.62              | 0.75              | 2.03                     | 0.12       | 0.13  | 44.26   |
| Total  | 2927.57               | 243.99 | 71.54              | 680.74               | 197.07            | 44.48             | 413.36                   | 29.93      | 30.84 | 4639.51 |

Table S12. The phosphorus inputs in the 31 provinces of China in 2015 (10<sup>4</sup> tons)

|              | Mineral<br>fertilizer | Straw | Cake<br>fertilizer | Excrements of animal | wet<br>deposition | Irrigation | Seed | Total  |
|--------------|-----------------------|-------|--------------------|----------------------|-------------------|------------|------|--------|
| Liaoning     | 47.52                 | 0.31  | 0.03               | 5.44                 | 0.16              | 0.07       | 0.03 | 53.56  |
| Jilin        | 88.71                 | 0.78  | 0.04               | 4.99                 | 0.22              | 0.06       | 0.04 | 94.84  |
| Heilongjiang | 94.51                 | 0.91  | 0.25               | 5.63                 | 0.51              | 0.23       | 0.14 | 102.16 |
| Beijing      | 2.75                  | 0.08  | 0.00               | 0.69                 | 0.01              | 0.01       | 0.00 | 3.53   |
| Tianjin      | 6.46                  | 0.07  | 0.01               | 0.83                 | 0.01              | 0.01       | 0.01 | 7.40   |
| Hebei        | 98.61                 | 3.39  | 0.21               | 8.52                 | 0.21              | 0.18       | 0.28 | 111.40 |
| Shanxi       | 43.53                 | 0.91  | 0.02               | 2.27                 | 0.13              | 0.07       | 0.09 | 47.03  |
| Shandong     | 154.12                | 4.55  | 0.34               | 15.77                | 0.24              | 0.23       | 0.44 | 175.69 |
| Henan        | 254.51                | 4.32  | 0.57               | 10.07                | 0.26              | 0.23       | 0.62 | 270.57 |
| Shanghai     | 1.93                  | 0.05  | 0.00               | 0.82                 | 0.01              | 0.01       | 0.01 | 2.83   |

|                    | Mineral<br>fertilizer | Straw | Cake<br>fertilizer | Excrements of animal | wet<br>deposition | Irrigation | Seed | Total  |
|--------------------|-----------------------|-------|--------------------|----------------------|-------------------|------------|------|--------|
| Jiangsu            | 72.19                 | 1.02  | 0.48               | 5.35                 | 0.15              | 0.19       | 0.24 | 79.61  |
| Zhejiang           | 17.75                 | 0.43  | 0.12               | 2.37                 | 0.06              | 0.07       | 0.02 | 20.82  |
| Anhui              | 87.45                 | 1.27  | 0.67               | 6.39                 | 0.19              | 0.17       | 0.30 | 96.42  |
| Hubei              | 91.60                 | 1.09  | 1.11               | 6.37                 | 0.17              | 0.12       | 0.15 | 100.60 |
| Hunan              | 50.16                 | 1.68  | 0.87               | 5.62                 | 0.13              | 0.13       | 0.03 | 58.62  |
| Jiangxi            | 40.15                 | 1.02  | 0.35               | 4.67                 | 0.10              | 0.09       | 0.02 | 46.40  |
| Inner-<br>Mongolia | 72.95                 | 0.67  | 0.26               | 1.18                 | 0.30              | 0.12       | 0.12 | 75.60  |
| Shaanxi            | 63.82                 | 0.52  | 0.19               | 1.75                 | 0.13              | 0.05       | 0.13 | 66.59  |
| Gansu              | 32.25                 | 0.21  | 0.16               | 0.80                 | 0.17              | 0.06       | 0.12 | 33.77  |
| Qinghai            | 3.64                  | 0.00  | 0.11               | 0.36                 | 0.02              | 0.01       | 0.01 | 4.16   |
| Ningxia            | 11.82                 | 0.08  | 0.00               | 0.18                 | 0.04              | 0.02       | 0.02 | 12.16  |
| Xinjiang           | 87.27                 | 0.48  | 1.35               | 0.93                 | 0.17              | 0.24       | 0.16 | 90.59  |
| Chongqing          | 25.02                 | 0.87  | 0.19               | 1.48                 | 0.08              | 0.02       | 0.05 | 27.71  |
| Sichuan            | 66.00                 | 2.29  | 0.96               | 5.70                 | 0.22              | 0.11       | 0.19 | 75.46  |
| Guizhou            | 21.20                 | 0.55  | 0.35               | 4.81                 | 0.15              | 0.05       | 0.08 | 27.16  |

|           | Mineral<br>fertilizer | Straw | Cake<br>fertilizer | Excrements of animal | wet<br>deposition | Irrigation | Seed | Total   |
|-----------|-----------------------|-------|--------------------|----------------------|-------------------|------------|------|---------|
| Yunnan    | 51.47                 | 1.21  | 0.23               | 3.99                 | 0.20              | 0.08       | 0.09 | 57.26   |
| Tibet     | 1.90                  | 0.00  | 0.02               | 0.71                 | 0.01              | 0.01       | 0.00 | 2.66    |
| Fujian    | 27.92                 | 0.22  | 0.03               | 4.47                 | 0.04              | 0.05       | 0.02 | 32.73   |
| Guangdong | 49.19                 | 1.11  | 0.05               | 7.20                 | 0.08              | 0.08       | 0.03 | 57.75   |
| Guangxi   | 61.53                 | 3.48  | 0.04               | 5.22                 | 0.14              | 0.07       | 0.03 | 70.50   |
| Hainan    | 11.48                 | 0.15  | 0.00               | 2.64                 | 0.02              | 0.01       | 0.00 | 14.31   |
| Total     | 1739.37               | 33.70 | 9.01               | 127.20               | 4.32              | 2.84       | 3.47 | 1919.90 |

Table S13. The N outputs in the 31 provinces of China in 2015 (10<sup>4</sup> tons)

|              | Crop uptake | Denitrification | Ammonia<br>volatilization | Leaching | Runoff | Volatilization | Total  |
|--------------|-------------|-----------------|---------------------------|----------|--------|----------------|--------|
| Liaoning     | 77.98       | 13.86           | 15.53                     | 1.38     | 1.60   | 4.01           | 114.35 |
| Jilin        | 128.34      | 16.96           | 19.16                     | 1.55     | 1.88   | 5.30           | 173.19 |
| Heilongjiang | 233.18      | 17.53           | 19.05                     | 4.13     | 4.64   | 12.03          | 290.57 |
| Beijing      | 2.99        | 1.03            | 1.25                      | 0.16     | 0.08   | 0.16           | 5.66   |
| Tianjin      | 7.81        | 1.78            | 2.09                      | 0.43     | 0.19   | 0.46           | 12.76  |

|                | Crop uptake | Denitrification | Ammonia volatilization | Leaching | Runoff | Volatilization | Total  |
|----------------|-------------|-----------------|------------------------|----------|--------|----------------|--------|
| Hebei          | 150.89      | 23.72           | 29.69                  | 7.64     | 3.14   | 8.19           | 223.27 |
| Shanxi         | 47.66       | 6.48            | 8.50                   | 2.72     | 1.04   | 3.07           | 69.47  |
| Shandong       | 217.58      | 30.09           | 38.20                  | 10.62    | 4.31   | 10.90          | 311.69 |
| Henan          | 262.80      | 41.65           | 51.50                  | 13.23    | 5.30   | 13.78          | 388.26 |
| Shanghai       | 4.01        | 1.83            | 1.38                   | 0.55     | 0.42   | 0.28           | 8.46   |
| Jiangsu        | 125.27      | 31.90           | 24.37                  | 11.64    | 9.17   | 7.33           | 209.67 |
| Zhejiang       | 27.97       | 11.11           | 7.43                   | 3.72     | 3.00   | 2.08           | 55.31  |
| Anhui          | 136.20      | 27.11           | 22.34                  | 12.15    | 9.86   | 8.59           | 216.24 |
| Hubei          | 104.00      | 30.65           | 25.22                  | 11.32    | 8.80   | 7.41           | 187.40 |
| Hunan          | 100.50      | 25.04           | 18.47                  | 12.88    | 11.06  | 7.94           | 175.89 |
| Jiangxi        | 63.53       | 12.66           | 9.46                   | 8.02     | 7.44   | 5.11           | 106.21 |
| Inner-Mongolia | 122.18      | 13.00           | 17.47                  | 2.63     | 0.34   | 6.33           | 161.94 |
| Shaanxi        | 49.53       | 14.98           | 17.91                  | 1.74     | 0.52   | 3.70           | 88.37  |
| Gansu          | 45.82       | 5.51            | 7.40                   | 1.54     | 0.49   | 3.37           | 64.14  |
| Qinghai        | 4.54        | 0.94            | 1.14                   | 0.16     | 0.05   | 0.40           | 7.23   |
| Ningxia        | 14.99       | 2.87            | 2.99                   | 0.44     | 0.18   | 0.92           | 22.38  |

|           | Crop uptake | Denitrification | Ammonia volatilization | Leaching | Runoff | Volatilization | Total   |
|-----------|-------------|-----------------|------------------------|----------|--------|----------------|---------|
| Xinjiang  | 85.98       | 13.02           | 17.70                  | 2.03     | 0.44   | 5.00           | 124.18  |
| Chongqing | 38.16       | 8.24            | 8.29                   | 5.07     | 3.78   | 3.12           | 66.66   |
| Sichuan   | 122.27      | 23.37           | 22.49                  | 13.00    | 9.84   | 8.73           | 199.70  |
| Guizhou   | 41.88       | 10.96           | 11.07                  | 6.94     | 5.00   | 4.40           | 80.25   |
| Yunnan    | 71.24       | 19.75           | 20.63                  | 8.49     | 6.34   | 5.57           | 132.02  |
| Tibet     | 1.36        | 0.89            | 0.98                   | 0.14     | 0.09   | 0.09           | 3.56    |
| Fujian    | 24.17       | 11.54           | 8.84                   | 3.96     | 3.10   | 2.09           | 53.69   |
| Guangdong | 57.10       | 25.04           | 20.40                  | 8.12     | 6.49   | 4.45           | 121.59  |
| Guangxi   | 91.22       | 18.97           | 16.57                  | 9.14     | 7.26   | 5.55           | 148.70  |
| Hainan    | 8.31        | 5.10            | 4.98                   | 1.42     | 1.11   | 0.76           | 21.67   |
| Total     | 2469.47     | 467.54          | 472.47                 | 166.93   | 116.97 | 151.09         | 3844.46 |

Table S14. the nutrient balance of the farmland in the 31 provinces in 2015

|          | N input<br>(10 <sup>4</sup> tons) | N output<br>(10 <sup>4</sup> tons) | N balance<br>(10 <sup>4</sup> tons) | N density (t<br>km <sup>-2</sup> ) | P input<br>(10 <sup>4</sup> tons) | P output<br>(10 <sup>4</sup> tons) | P balance<br>(10 <sup>4</sup> tons) | P density (t<br>km <sup>-2</sup> ) |
|----------|-----------------------------------|------------------------------------|-------------------------------------|------------------------------------|-----------------------------------|------------------------------------|-------------------------------------|------------------------------------|
| Liaoning | 141.42                            | 53.56                              | 27.07                               | 4.97                               | 114.35                            | 36.68                              | 16.88                               | 3.10                               |

|              | N input<br>(10 <sup>4</sup> tons) | N output<br>(10 <sup>4</sup> tons) | N balance<br>(10 <sup>4</sup> tons) | N density (t<br>km <sup>-2</sup> ) | P input<br>(10 <sup>4</sup> tons) | P output<br>(10 <sup>4</sup> tons) | P balance<br>(10 <sup>4</sup> tons) | P density (t<br>km <sup>-2</sup> ) |
|--------------|-----------------------------------|------------------------------------|-------------------------------------|------------------------------------|-----------------------------------|------------------------------------|-------------------------------------|------------------------------------|
| Jilin        | 174.05                            | 94.84                              | 0.86                                | 0.12                               | 173.19                            | 59.69                              | 35.15                               | 4.98                               |
| Heilongjiang | 234.85                            | 102.16                             | -55.72                              | -3.50                              | 290.57                            | 91.36                              | 10.80                               | 0.68                               |
| Beijing      | 10.76                             | 3.53                               | 5.09                                | 14.38                              | 5.66                              | 1.76                               | 1.77                                | 5.01                               |
| Tianjin      | 18.04                             | 7.40                               | 5.28                                | 11.31                              | 12.76                             | 4.14                               | 3.27                                | 7.00                               |
| Hebei        | 273.86                            | 111.40                             | 50.59                               | 6.87                               | 223.27                            | 72.09                              | 39.31                               | 5.34                               |
| Shanxi       | 84.23                             | 47.03                              | 14.76                               | 3.31                               | 69.47                             | 24.77                              | 22.26                               | 4.98                               |
| Shandong     | 357.20                            | 175.69                             | 45.51                               | 5.46                               | 311.69                            | 106.02                             | 69.67                               | 8.36                               |
| Henan        | 462.57                            | 270.57                             | 74.32                               | 8.93                               | 388.26                            | 137.61                             | 132.97                              | 15.97                              |
| Shanghai     | 13.60                             | 2.83                               | 5.13                                | 24.86                              | 8.46                              | 2.04                               | 0.78                                | 3.80                               |
| Jiangsu      | 245.28                            | 79.61                              | 35.61                               | 7.30                               | 209.67                            | 58.84                              | 20.77                               | 4.26                               |
| Zhejiang     | 80.94                             | 20.82                              | 25.63                               | 10.00                              | 55.31                             | 14.09                              | 6.73                                | 2.62                               |
| Anhui        | 239.19                            | 96.42                              | 22.95                               | 3.69                               | 216.24                            | 63.27                              | 33.15                               | 5.33                               |
| Hubei        | 253.78                            | 100.60                             | 66.37                               | 11.57                              | 187.40                            | 56.99                              | 43.61                               | 7.60                               |
| Hunan        | 201.52                            | 58.62                              | 25.63                               | 5.32                               | 175.89                            | 47.88                              | 10.74                               | 2.23                               |
| Jiangxi      | 112.32                            | 46.40                              | 6.11                                | 1.79                               | 106.21                            | 30.55                              | 15.85                               | 4.65                               |

|                | <b>N input</b><br><b>(10<sup>4</sup>tons)</b> | <b>N output</b><br><b>(10<sup>4</sup>tons)</b> | <b>N balance</b><br><b>(10<sup>4</sup>tons)</b> | <b>N density (t</b><br><b>km<sup>-2</sup>)</b> | <b>P input</b><br><b>(10<sup>4</sup>tons)</b> | <b>P output</b><br><b>(10<sup>4</sup>tons)</b> | <b>P balance</b><br><b>(10<sup>4</sup>tons)</b> | <b>P density (t</b><br><b>km<sup>-2</sup>)</b> |
|----------------|-----------------------------------------------|------------------------------------------------|-------------------------------------------------|------------------------------------------------|-----------------------------------------------|------------------------------------------------|-------------------------------------------------|------------------------------------------------|
| Inner-Mongolia | 161.31                                        | 75.60                                          | -0.64                                           | -0.07                                          | 161.94                                        | 53.17                                          | 22.43                                           | 2.41                                           |
| Shaanxi        | 157.74                                        | 66.59                                          | 69.37                                           | 14.41                                          | 88.37                                         | 30.00                                          | 36.59                                           | 7.60                                           |
| Gansu          | 70.81                                         | 33.77                                          | 6.66                                            | 1.18                                           | 64.14                                         | 21.67                                          | 12.10                                           | 2.15                                           |
| Qinghai        | 10.82                                         | 4.16                                           | 3.60                                            | 6.05                                           | 7.23                                          | 2.56                                           | 1.60                                            | 2.68                                           |
| Ningxia        | 27.92                                         | 12.16                                          | 5.54                                            | 4.13                                           | 22.38                                         | 7.57                                           | 4.59                                            | 3.42                                           |
| Xinjiang       | 158.17                                        | 90.59                                          | 33.99                                           | 5.85                                           | 124.18                                        | 43.63                                          | 46.96                                           | 8.08                                           |
| Chongqing      | 87.22                                         | 27.71                                          | 20.56                                           | 7.61                                           | 66.66                                         | 17.94                                          | 9.77                                            | 3.62                                           |
| Sichuan        | 240.16                                        | 75.46                                          | 40.46                                           | 5.42                                           | 199.70                                        | 56.09                                          | 19.37                                           | 2.59                                           |
| Guizhou        | 112.29                                        | 27.16                                          | 32.04                                           | 6.81                                           | 80.25                                         | 19.41                                          | 7.75                                            | 1.65                                           |
| Yunnan         | 190.60                                        | 57.26                                          | 58.58                                           | 7.47                                           | 132.02                                        | 33.15                                          | 24.11                                           | 3.07                                           |
| Tibet          | 8.59                                          | 2.66                                           | 5.03                                            | 11.31                                          | 3.56                                          | 1.04                                           | 1.61                                            | 3.63                                           |
| Fujian         | 84.67                                         | 32.73                                          | 30.98                                           | 14.69                                          | 53.69                                         | 14.52                                          | 18.21                                           | 8.63                                           |
| Guangdong      | 196.72                                        | 57.75                                          | 75.13                                           | 19.33                                          | 121.59                                        | 28.93                                          | 28.82                                           | 7.41                                           |
| Guangxi        | 184.66                                        | 70.50                                          | 35.96                                           | 6.55                                           | 148.70                                        | 37.88                                          | 32.62                                           | 5.95                                           |
| Hainan         | 44.26                                         | 14.31                                          | 22.59                                           | 13.71                                          | 21.67                                         | 5.54                                           | 8.78                                            | 5.33                                           |

Table S15. Comparison of the N budget in different research(Ti *et al.*, 2012; Gu *et al.*, 2015; He *et al.*, 2018)

| Tg N yr <sup>-1</sup>           | Gu <i>et al.</i> , 2015<br>in 2010 | Ti <i>et al.</i> , 2012 in<br>2007 | He <i>et al.</i> , 2018<br>in 2010 | This Study in<br>2015 |
|---------------------------------|------------------------------------|------------------------------------|------------------------------------|-----------------------|
| Chemical fertilizer             | 28.9                               | 27.8                               | 30.7                               | 29.3                  |
| Organic fertilizer              | 8.0                                | -                                  | 16.1                               | 10.0                  |
| Deposition                      | 2.7                                | 2.3                                | 2.9                                | 2.4                   |
| Biological<br>Nitrogen Fixation | 4.6                                | -                                  | 3.7                                | 4.1                   |
| Irrigation                      | 0.6                                | -                                  | 0.8                                | 0.3                   |
| Seed                            | -                                  | -                                  | 0.4                                | 0.3                   |
| Total input                     | 45.8                               | -                                  | 54.7                               | 46.4                  |
| Crop uptake                     | 18.0                               | 30.1 <sup>a</sup>                  | 21.6                               | 24.7                  |
| Denitrification                 | 7.9                                | -                                  | 8.2                                | 4.7                   |
| Ammonia<br>volatilization       | 7.7                                | 6.7                                | 7.0                                | 4.7                   |
| leaching                        | 2.1                                | 2.1 <sup>b</sup>                   | 2.4                                | 1.7                   |
| runoff                          | 2.4                                | -                                  | 2.5                                | 1.2                   |
| Total output                    | 38.0                               | -                                  | 41.7                               | 38.4                  |

<sup>a</sup> This value included the crop uptake and denitrification

<sup>b</sup> This value included leaching and runoff



## References

- Cai CF, D.S., Shi ZH, Huang L, Zhang GY., 2000. Study of applying USLE and Geographical information system IDRISI to predict soil erosion in small watershed. *Journal of Soil and Water Conservation* 14, 19-24.
- Chen, L., Watanabe, M., Wang, Q., 2008. Changes in nitrogen budgets and nitrogen use efficiency in the agroecosystems of the Changjiang River basin between 1980 and 2000. *Nutrient Cycling in Agroecosystems* 80, 19-37.
- Gu, B., Ju, X., Chang, J., Ge, Y., Vitousek, P.M., 2015. Integrated reactive nitrogen budgets and future trends in China. *Proceedings of the National Academy of Sciences* 112, 8792.
- He, W., Jiang, R., He, P., Yang, J., Zhou, W., Ma, J., Liu, Y., 2018. Estimating soil nitrogen balance at regional scale in China's croplands from 1984 to 2014. *Agricultural Systems* 167, 125-135.
- Li, S.t., Jin, j.y., 2011. Characteristics of Nutrient Input/Output and Nutrient Balance in Different Regions of China. *Scientia Agricultura Sinica* 44, 4207-4229.
- Liu, X., 2005. Nitrogen Cycling and Balance in "Agriculture-Livestock-Nutrition-Environment" System of China. Agricultural University of Hebei, Baoding.
- Mei, C., 2014. Risk Assessment and Regionalization of Agricultural Non-point Source Pollution Nanjing University, Nanjing.
- Peng, K., Ouyang, H., Zhu, B., 2004. Nitrogen balance, pollution and management in a typical agro-forest ecosystem. *Journal of Agro-environmental Science*.
- R.K, L., 1998. Soil-Plant Nutrition Principle and Fertilization. Chemical Industry Press, Beijing.
- Sharpley, A.N., Williams, J.R., 1990. EPIC-erosion/productivity impact calculator: 2. User manual. Technical Bulletin - United States Department of Agriculture 4, 206-207.
- Ti, C., Pan, J., Xia, Y., Yan, X., 2012. A nitrogen budget of mainland China with spatial and temporal variation. *Biogeochemistry* 108, 381-394.
- Wang, X., Feng, A., Wang, Q., Wu, C., Liu, Z., Ma, Z., Wei, X., 2014. Spatial variability of the nutrient balance and related NPSP risk analysis for agro-ecosystems in China in

2010. *Agriculture, Ecosystems & Environment* 193, 42-52.

Wang, X., Hao, F., Cheng, H., Yang, S., Zhang, X., Bu, Q., 2010. Estimating non-point source pollutant loads for the large-scale basin of the Yangtze River in China. *Environmental Earth Sciences* 63, 1079-1092.

Wischmeier, W.H., 1977. Use and Misuse of the Universal Soil Loss Equation.

ZHANG, G., LU, F., ZHAO, H., 2017. Residue usage and farmers' recognition and attitude toward residue retention in China's croplands. *Journal of Agro-Environment Science* 36, 981-988.

Zhang Min, G.Z., 1992. DISTRIBUTION, CHARACTERISTICS AND TAXONOMIC CLASSIFICATION OF VERTISOLS IN CHINA. *Acta Pedologica Sinica*.

Zhang, W., Li, X., Swaney, D.P., Du, X., 2016. Does food demand and rapid urbanization growth accelerate regional nitrogen inputs? *Journal of Cleaner Production* 112, 1401-1409.
